# Supplementary material
Source: publisher site journal article supplement (https://www.degruyterbrill.com/publication/journal_key/ZFMW/downloadAsset/ZFMW_Leseprobe.pdf)
Supplement: Supplementary file 1 [file ZFMW_Leseprobe.pdf]

ZEITSCHRIFT FÜR  
MEDIENWISSENSCHAFT

zfm

I/2022

26

X | KEIN LAGEBERICHT

---

**Aus:**

*Gesellschaft für Medienwissenschaft (Hg.)*  
**Zeitschrift für Medienwissenschaft 26**  
Jg. 14, Heft 1/2022: X – Kein Lagebericht

April 2022, 196 S., kart.

24,99 € (DE), 978-3-8376-5889-7  
E-Book: kostenlos erhältlich als Open-Access-Publikation

PDF: ISBN 978-3-8394-5889-1  
EPUB: ISBN 978-3-7328-5889-7

Die Zeitschrift für Medienwissenschaft steht für eine kulturwissenschaftlich orientierte Medienwissenschaft, die Untersuchungen zu Einzelmedien aufgreift und durchquert, um nach politischen Kräften und epistemischen Konstellationen zu fragen. Sie stellt Verbindungen zu internationaler Forschung ebenso her wie zu verschiedenen Disziplinen und bringt unterschiedliche Schreibweisen und Textformate, Bilder und Gespräche zusammen, um der Vielfalt, mit der geschrieben, nachgedacht und experimentiert werden kann, Raum zu geben.

Heft 26 »X | Kein Lagebericht« fordert die Auseinandersetzung mit Rassismus in der Medienwissenschaft auch außerhalb von Forschungsberichten. Dass in einer sich als dekonstruierend verstehenden Wissenschaft kritische Diversität zu kurz kommt, wird als Widerspruch aufgefasst und als »Symptom« in den Blick genommen.

Die **Gesellschaft für Medienwissenschaft (GfM)** vertritt als Fachgesellschaft medienwissenschaftlich arbeitende Forscher\_innen und Lehrende im deutschsprachigen Raum. Sie ist Herausgeberin der Zeitschrift für Medienwissenschaft.

Weitere Informationen und Bestellung unter:  
[www.transcript-verlag.de/978-3-8376-5889-7](http://www.transcript-verlag.de/978-3-8376-5889-7)

---

# INHALT

## Editorial

### X | KEIN LAGEBERICHT

- 10 ÖMER ALKIN / JIRÉ EMINE GÖZEN / NELLY Y. PINKRAH  
**X | Kein Lagebericht** Einleitung in den Schwerpunkt
- 24 CHRISTINE GOUTRIÉ  
**Rassismus- und herrschaftskritische Faktographie**
- 37 JIRÉ EMINE GÖZEN  
**Ein Weiterdenken im Anschluss an Christine Goutriés  
«Rassismus- und herrschaftskritische Faktographie»**
- 41 ESRA CANPALAT  
**In den Arkaden der Übersetzung** Gedanken zu Autoethnografie,  
kultureller Identität und Authentizität
- 54 MARY SHNAYIEN  
**Sichere Räume, reparative Kritik** Überlegungen zum Arbeiten  
mit verletzendem Material
- 66 LOUIS BREITSOHL / ELISABETH MOHR  
**The West and the Rest** Antirassistische Arbeit als kontinuierliche Praxis des  
Befragens, Zuhörens und Ansprechens (in) der Filmwissenschaft
- 78 TILL KADRITZKE  
**Singuläre Filme und Gefühle** «Agency panic», das *weiße* New Hollywood  
und das Begehren nach dem Affekt
- 91 JENS SCHRÖTER  
**Zum Eurozentrismus im Begriff des Bildes**
- 101 SARA MORAIS DOS SANTOS BRUSS  
**«A New Science?»** Zum antirassistischen Potenzial materialistischer  
Medienwissenschaften

- 111 W. J. T. MITCHELL im Gespräch mit ÖMER ALKIN  
**«Seeing Through Race» & Versuche, durch die Medien  
 (-wissenschaft) zu sehen**
- 125 SARAH SHARMA im Gespräch mit JOHANNES BRUDER  
 und NELLY Y. PINKRAH  
**McLuhan unter Palmen** Über Orte des Denkens, Sprechens und Handelns

## BILDSTRECKE

- 140 MIGRANTENSTADL / TALYA FELDMAN / SHARONDA  
 QUAINOO / OFFENER PROZESS / INITIATIVE OURY JALLOH  
 vorgestellt von JIRÉ EMINE GÖZEN  
 und konzipiert von der Schwerpunktreaktion  
**Empathie || Isigkeit**
- 
- 150 EINE GRUPPE AUS DEM FAM  
**Rassismuskritische Arbeit an/in der Medienwissenschaft:  
 Das Forum Antirassismus Medienwissenschaft (FAM)**
- 159 ARBEITSKREIS KANONKRITIK  
**Welcher Kanon, wessen Kanon?** Eine Einladung zur Diskussion
- 172 MARIE ELOUNDOU / LISA KARST / DULGUUN SHIRCHINBAL  
**Dear white professors, warum sind alle «Klassiker» «weiß»?**
- 181 Protokolliert und arrangiert von JENNIFER EICKELMANN /  
 SOPHIE G. EINWÄCHTER / FELIX T. GREGOR /  
 ULRIKE HANSTEIN und SANDRA KERO  
**Kamera an, Kamera aus?** Ein Gespräch über Sichtbarkeiten in der  
 Videostream-basierten Lehre
- 192 ARBEITSKREIS UMFRAGE DES FAM  
**«Wie «weiß» ist die deutschsprachige Medienwissenschaft?»**  
 Hintergründe, Ergebnisse und Reflexionen zur Umfrage der GfM und des Forum  
 Antirassismus Medienwissenschaft
- 199 AUTOR\_INNEN  
 203 BILDNACHWEISE  
 204 IMPRESSUM

**X | KEIN LAGEBERICHT**

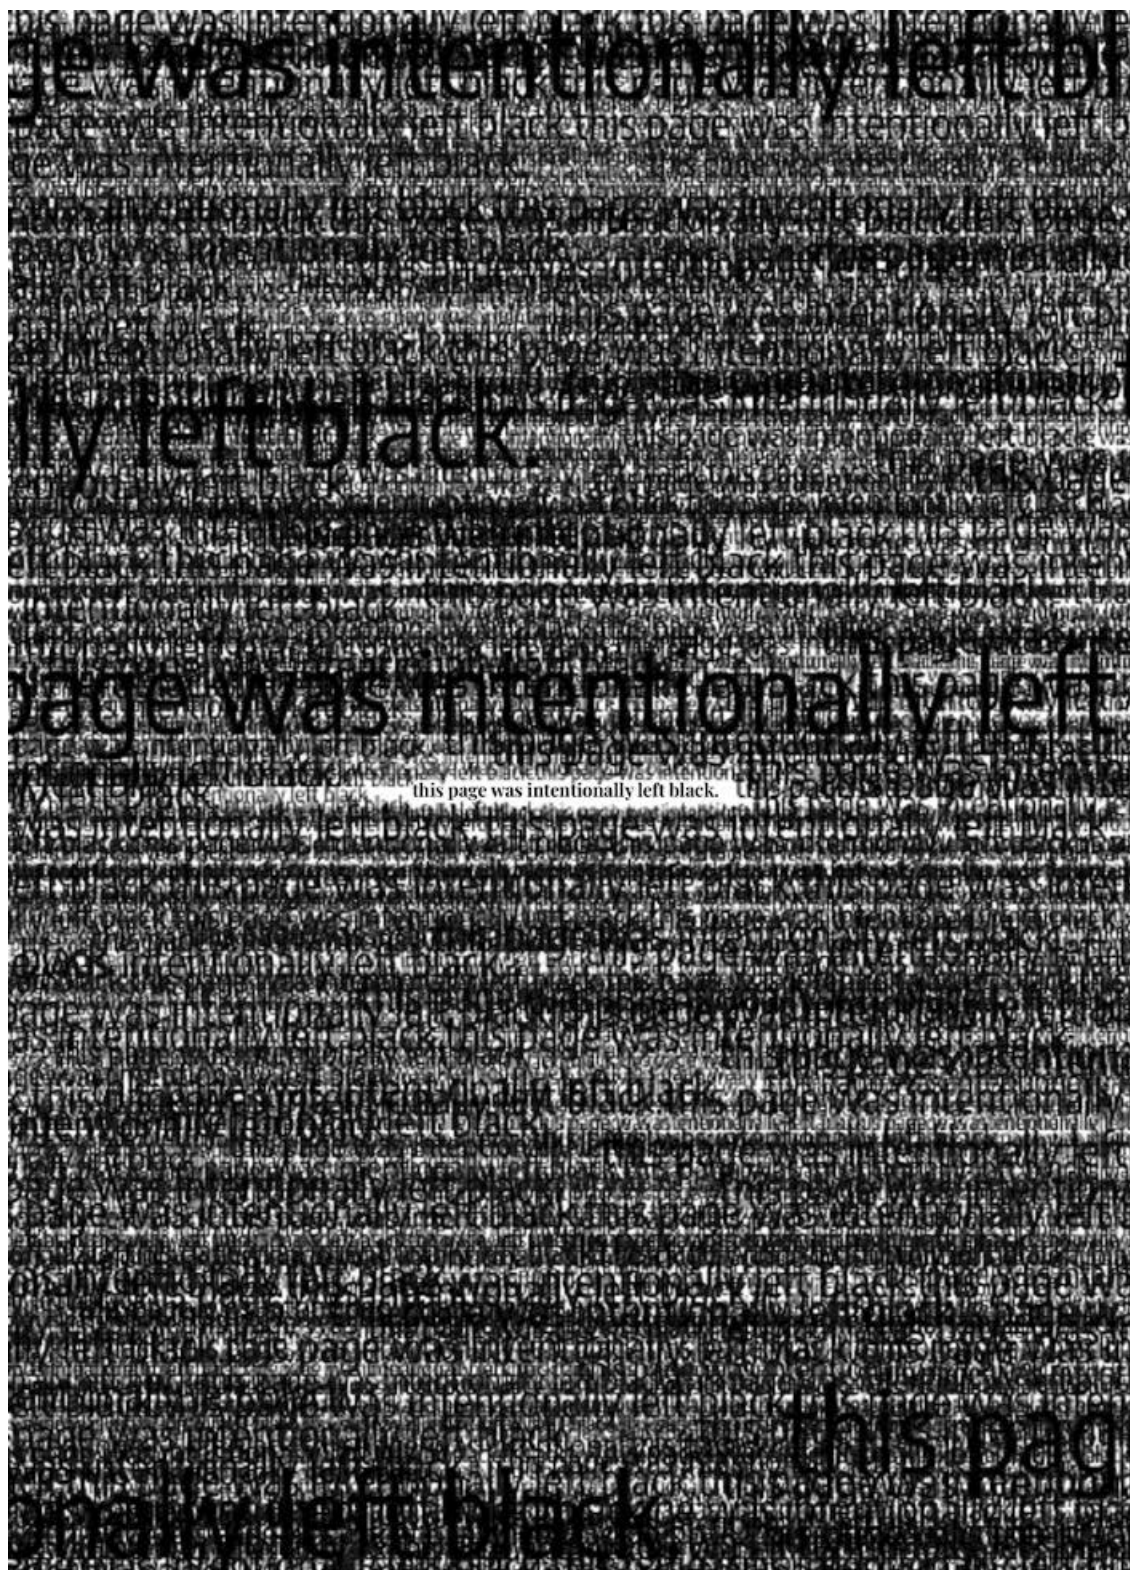

this page was intentionally left black. *almost.*

# X | KEIN LAGEBERICHT

---

## Einleitung in den Schwerpunkt

### **Die Lage: Rassismus und Medienwissenschaft, Rassismus in der Medienwissenschaft**

Vor acht Monaten formulierten wir für den Call for Papers dieser Ausgabe: «Medienwissenschaft muss antirassistische Praxis werden und darf sich nicht auf Forschungs- oder Lageberichte beschränken.» Der Lagebericht markiert für uns einen wichtigen Punkt, von dem aus ein solches Projekt in Gang gesetzt werden kann – ein Projekt, von dem wir hoffen, dass es die vielfältigen auf Rassismus bezogenen Aktivitäten außerhalb und die zunehmenden Aktivitäten innerhalb der Medienwissenschaft zu verbinden weiß. Über den Bericht hinaus besteht ein Wunsch nach Verhandlung, Vorstellungskraft und Veränderung. Der Lagebericht hängt dabei maßgeblich mit diesem noch anstehenden Prozess zusammen – wobei Zusammenhang das zentrale Wort ist. Ließe sich eine Erkenntnis (post-)pandemischen Lebens inmitten einer globalen Klimakatastrophe, bestimmt von neoliberalen Ausbeutungsdynamiken sowie mörderischen, nekropolitischen (Kriegs-)Zuständen, destillieren, dann bestünde das Destillat in der Einsicht, dass sie alle miteinander in Verbindung (zu setzen) sind und daher einen Kraftakt des Widerstands, aber auch der Analyse und der Resilienz erfordern. Die zu beschreibende Lage konstituiert sich innerhalb eines schwer fassbaren Zusammenhangs, einer Gewordenheit der Welt. Mit einigen Fragen, die in diesem Heft gestellt werden, möchten wir einen Teil des Zusammenhangs erschließen, den wir in seiner Gesamtheit als zu wenig adressiert erachten. Wir wissen jedoch um sein Wirken.

Unverkennbar und in der Aufmachung schon paratextuell wie parasensuell vorweggenommen ist, dass Rassismus in seiner Varianz und Komplexität im Zentrum dieses Heftes steht:

Rassismus kann als eine Infrastruktur, als ein vielschichtiges System verstanden werden. Er gewinnt seine Stabilität aus einem komplexen Ineinandergreifen intersubjektiver Wahrnehmungen und Handlungen (soziale Praxis), instituierter Ungleichheiten (soziale Strukturen) und der Produktion von Bildern hierarchisierter Differenz (symbolische Ordnung). Rassismus ist nicht umkehrbar. Soziale Experimente (z. B. <Dunkles, rätselhaftes Österreich>), die die dominante Herstellung von Differenz umdrehen, sind aufschlussreich, um die Mechanismen von rassistischer Markierung nachzuvollziehen. Sie setzen sich aber nicht als rassistisches Wissen durch, da ihnen instituierte Strukturen fehlen.<sup>1</sup>

Um Rassismus soll es nicht im Allgemeinen, sondern im Spezifischen gehen – und zwar spezifisch hinsichtlich der deutschsprachigen Medienwissenschaft. Als Wissenschaftskultur ist sie nicht minder herrschaftsmächtig und rassistisch mit den entstandenen Strukturen verbunden.

Die Medienwissenschaft schreibt Geschichte, und es lohnt, immer wieder ihre grundlegende Prämisse zu betonen, dass auch sie Produkt historischer Bedingtheiten ist. Kulturwissenschaftlich versteht sie sich selbst als Meta-Wissenschaft, die umfassend philosophisch dekonstruiert, so weit sogar, dass sie ontologische, epistemologische und zugleich komplexe Verwicklungen im Sinne einer Onto-Epistemologie vorschlägt. Nicht von ungefähr gehören die jungen Science and Technology Studies zu ihren nächsten Nachbarn: Disziplinen, die also Wissenschaftskultur selbst als ihren Forschungsgegenstand adressieren.

War sich die Medienwissenschaft ihrer eigenen Medialität immer bewusst, so gilt es nun, sie selbst auf ihre institutionellen und wissenschaftssystemischen Bereiche rassismuskritisch zu befragen. Eine <Störung> des Feldes – durch verschiedenförmige Um-, Ver- und Be-Lagerungen – kann die Medialität ausweisen und sie produktiv machen. In mehrfacher Hinsicht ist das hier aufgerufene Feld kein unbespieltes. So ließe sich an die gesamte Historie der kulturwissenschaftlichen Medienwissenschaft anknüpfen, zu der die feministische Filmtheorie genauso gehört wie die zuletzt verstetigten Verbindungen zur postkolonialen Theorie.<sup>2</sup>

Das <X> im Titel dieses Heftes steht also für ein Durchkreuzen und Durchdenken rassistischer und diskriminierender Mechanismen und Denkweisen. Es geht uns aber auch darum, das Verbindungsmoment, den Kreuzungspunkt im <X>, zu erkennen und die bestehenden produktiven Rahmen zu erweitern. Zugleich verleiht <X> der Leere eine Form und tritt an die Stelle der Namen und Perspektiven, die uns nicht allen bekannt sind. Es symbolisiert Multiplikation, die vielfältige Formen annehmen kann und polyphon ist. <X> adressiert zuletzt das Dazwischen, den Defekt und die Dysfunktionalität, die Ver-, Über- und Quer-Lagerungen sowie die affektiven Schwierigkeiten des Redens und Schreibens *über*. Letzteres – ein Reden über das Thema in einem Reden mit- und übereinander – hat die Arbeit am Schwerpunkt dieses Hefts <mehrlagig> informiert. Es existiert ein Unbehagen an der Unmöglichkeit eines bestimmten Redens miteinander und ebenso die Erkenntnis, Brüche produktiv machen zu

<sup>1</sup> Maisha-Maureen Auma: Rassismus, in: Bundeszentrale für politische Bildung. Dossier Migration, 30.11.2017, [bpb.de/gesellschaft/migration/dossier-migration/223738/rassismus](https://bpb.de/gesellschaft/migration/dossier-migration/223738/rassismus) (16.1.2022).

<sup>2</sup> Die Breite des Spektrums der Ansätze und Überlegungen, die hierzu in den letzten Jahren entstanden sind, zeigt sich insbesondere in der Buchreihe *Post\_koloniale Medienwissenschaft*, die seit 2013 von Ulrike Bergemann im transcript-Verlag herausgegeben wird.



müssen. All die erwähnten Lagen können hier (noch) gar nicht erfasst sein. Sie werden im Laufe des Schwerpunkts aber aufblitzen und das ihre tun.

In *Black Skin, White Masks* entwirft Frantz Fanon eine Dialektik des körperlichen und des epidermalen Schemas.<sup>3</sup> Ersteres erlaubt dem Körper, einen Platz in der Welt zu haben, während Letzteres diesen Körper von außen neu zusammensetzt. Innerhalb dieser Spannung, einer Diskrepanz zwischen Körper und Bewusstsein, lässt sich auch für uns erzählen, was irgendwie in Worte gefasst werden muss. Mit dem Heftumschlag suchen wir eine Entsprechung für die Widersprüche zu finden, die die Welt im Allgemeinen und damit auch das Entstehen dieses Schwerpunkts im Konkreten, seinen Einsatz und seine Notwendigkeit, seine Ideen, seine Ermöglichkeiten, aber auch Versäumnisse und Unzulänglichkeiten durchziehen. Weiß auf Weiß erweist sich demnach als die <buchhätliche> Wiederholung all jener Ambivalenzen, denen auch zwischen dem Umschlag zu begegnen sein wird. Zugleich impliziert *weiß* ein Spektrum des Weißen, das sich nicht auf eine ontologische Qualität reduzieren lässt: Weißer geht immer und die Nuancen der Farbe sind unendlich. Weniger das Farbspektrum als vielmehr die *optische Haptik*<sup>4</sup> motiviert jedoch die Idee für den Umschlag des Heftes. Das involviert die Griffbarkeit, die Materialität des Heftes, das Angefasstsein und Angefasstwerden sowie das Sich-angreifbar-Machen. All das ist auch verbunden durch eine Verletzlichkeit oder vorsätzliche Verletzung, deren Entstehungsbedingung hier auf den Umschlag – die Spannung zwischen Körperlichkeit und Epidermalem – zurückgeht. Wie lange ein Exemplar wohl jeweils unbefleckt bleiben wird? Ein <Heft *of color*> sollte es gerade deshalb aber nicht werden.

Es wird die Perspektive sein, die die Antwort auf diese Frage bestimmt. Je nach Blickwinkel – auf das Cover und auf jeden Text – und je nach Standort zeigt sich etwas oder lässt sich erkennen, und doch bleibt vieles verborgen. Was Sichtbarkeit und Unsichtbarkeit in einem solchen Projekt bedeuten, hoffen wir anhand konkreter Fragen und Praktiken zu verdeutlichen. Weil beide mit dem körperlichen und dem epidermalen Schema zusammenhängen, sprechen wir zugleich von Nicht-Wissen oder Unwissen, denn (bestimmtes) Wissen ist verkörpert und ergibt sich erst aus der Spannung zwischen diesen beiden. Verkörpertes Wissen und die involvierte Erfahrung sind es, die wir in einem Heft zu antirassistischer Praxis nur hervorheben können. Wir sind deshalb interessiert an den Dimensionen verschiedener Erfahrungen und ihren Verschränkungen.

### (K)eine Einleitung

Ende 2020 formierte sich innerhalb der deutschsprachigen Medienwissenschaft mit dem Forum Antirassismus Medienwissenschaft (FAM) ein Netzwerk, das die durch die Pandemie erzwungene Trennung und Vereinzelung im digitalen Raum aufzuheben und eine gemeinsame solidarische Praxis einzuüben suchte. Diese sollte sich nicht auf eine reflexive Geste der Epistemologie des Fachs

<sup>3</sup> Vgl. Frantz Fanon: *Black Skin, White Masks*, New York 1952.

<sup>4</sup> Vgl. Laura U. Marks: *The Skin of the Film. Intercultural Cinema, Embodiment, and the Senses*, Durham, London 2000.

reduzieren, sondern eine breit angelegte kritisch-reflexive Befragung des eigenen Denkens, Lehrens, Forschens, Einordnens und Werdens und damit ihrer Kultur bedeuten: also in antirassistische Praxis münden und darüber auch in die Gesellschaft hineinwirken. Diese Bewegung trat bereits im ersten Treffen des FAM als gemeinsames Begehren in Erscheinung. Denn als Beschäftigungs- und Handlungsfeld ist die Medienwissenschaft in ebenjene Strukturen und Kontinuitäten eingebettet, welche rassialisierende Ausschlüsse produzieren.

In diesem Sinne beschränkt sich dieses Heft nicht auf eine <inhaltistische> Beschäftigung mit dem Zusammenhang zwischen Medien und Rassismus. Analysen zu rassistischen Repräsentationen und Dynamiken, die medienwissenschaftlich reflektiert werden, konnten nicht unser Anliegen sein: Systemische Reflexion bedingt, die Struktur der eigenen Produktion (die Situation innerhalb der Medienwissenschaft sowie die medienwissenschaftliche Tätigkeit) eben nicht von der Struktur der aus dieser Produktion entstehenden Erkenntnisse zu entkoppeln. Zusätzlich zu theoretischer Begriffsarbeit erfordert diese Aufgabenstellung, Vielstimmigkeit herzustellen, die verschiedenen Perspektiven Raum gibt und deren Situiertheit anerkennt und mitreflektiert. Sie ist eine der Bedingungen kultureller Enthierarchisierung. Das Zulassen, das Fördern und die Reflexion einer solchen Vielstimmigkeit, die offen füreinander (und für ein Anderes) ist, verstehen wir als Grundbedingung antirassistischer Praxis. Damit sind nicht nur unterschiedliche Standpunkte und Positionalitäten gemeint, sondern auch das weitere Aufarbeiten von kolonialen, aber auch präkolonialen Kontinuitäten, die sich durch die (medien-)wissenschaftliche Theorie- und Kanonbildung sowie Geschichtsschreibung ziehen. Dabei gilt es im Blick zu behalten, dass koloniale Kontinuitäten sich nicht auf Theoriebildung und Wissenschaft beschränken, sondern Kolonialismus für viele Menschen weiterhin eine Realität ist.

Eine der Schwierigkeiten rassismuskritischer Arbeit liegt in der Gefahr, den Unterschied zwischen Perspektiven von denen, die von Rassismus betroffen sind, und denen, die davon nicht betroffen sind, zu nivellieren. Im FAM war man sich einig, dass ein Team, zusammengesetzt aus sich als nicht-*weiß* verstehenden Medienwissenschaftler\_innen, diese Ausgabe verantworten sollte, weil ihre rassialisierten Subjektivitäten als Medium der Perspektivierung dienen können. Diese aus einer von vielfältigen Unsicherheiten geprägten Suchbewegung hervorgegangene Arbeitsteilung zielte nicht nur darauf ab, marginalisierte Perspektiven, Positionen und Namen zu repräsentieren. Sie entstand aus dem Begehren, einen Prozess anzustoßen, in dem reflektiert werden kann, was die Positionsabhängigkeit des jeweiligen Denkens, Sprechens, Tuns und Wahrnehmens bedeutet und welche Unterschiede sicht- und adressierbar werden.

Vielfach wird einer solch <positiv diskriminierenden> Perspektive, die für die Notwendigkeit der Inklusion eines <strategisch-essentialistischen><sup>5</sup> Erfahrungswissens argumentiert, identitätspolitisches Kalkül unterstellt. Braucht es die Rassialisierten, um Rassismus überhaupt angemessen verhandeln zu können? Das nicht. Allerdings stellt Sozialisation selbst eine komplexe (oftmals nicht

<sup>5</sup> Gayatri Chakravorty Spivak: *Can the Subaltern Speak? Postkolonialität und subalterne Artikulation*, übers. v. Alexander Joskowicz, Stefan Nowotny, Wien 2007.

intendierte) Recherche-, eher noch Habitualisierungsform dar, die nicht anderweitig erreicht werden kann. Die Frage ist also nicht, ob es die Rassialisierten braucht, um Rassismus angemessen beschreiben, analysieren und verstehen zu können, sondern ob nicht jene Perspektive der Rassialisierten selbst für die Kultur der Beschreibbarkeit, der Analyse und der Deutung gerade deswegen erforderlich ist, weil sie aufgrund des Rassismus ausgeschlossen geblieben ist. Wenn der Medienwissenschaft also Perspektiven von Subjekten in der Subjektivierungsform der\_des Rassialisierten fehlen, ist dies ein substanzieller Teil der Betroffenenkultur, der nicht Teil der Auseinandersetzung ist. Dieses Defizit scheint uns fatal. Wir haben der Medialisierung in Form unserer Subjektivitäten zugestimmt, dabei ist Rassialisierung nicht der einzige, aber ein sehr spezifischer Teil dieser Subjektivität.

Andersherum wäre die Frage: Dürfen *Weiß*e über Themen sprechen, die sich ihrer Betroffenheitssphäre entziehen? Das darin enthaltene essentialisierende Moment tritt schnell zutage, insofern Inhalte oder Themen natürlich frei von der identitätslogischen Beschaffenheit des Aussagesubjekts bleiben können. Es muss kein intrinsisches Bündnis zwischen Aussagesubjekt und Inhalt geben. Das bedeutet aber nicht, dass die Handlung des Aussagens jemals unter gleich(berechtigt)en Bedingungen möglich sein kann. Anders gesprochen: Wir können unsere Welt nicht von ihrem Werden entkoppeln oder den Inhalt vom Kontext. Tun wir das, so verkennen wir die <intraaktive><sup>6</sup> Verschränkung, die zwischen Tun und Ergebnis besteht. Das produktive Aufbrechen der Dichotomie von Inhalt und Form – jener Dichotomie, die von der Medientheorie und mehr noch in der Philosophie in schier unendlichen Kombinationen dekonstruiert wurde – durchzieht als Muster und Raster nahezu alle Beiträge des Schwerpunktteils dieser Ausgabe der ZfM.

Es scheint bezeichnend, dass in der Medienwissenschaft die Reflexion des Offensichtlichsten, dieses dualen *pattern*, dort logisch aussetzt, wo die rassialisierenden Dynamiken am wirkmächtigsten sind. <Form> steht hier für die medienwissenschaftlich-kulturelle Matrix, ihren Beschäftigungsapparat, ihre Umwelt, ihr System bzw. ihr Medium; und <Inhalt> steht für die Theorien, Methoden und Erkenntnisse der Medienwissenschaft, die sie als (zumeist) textuellen Sinn erzeugt.<sup>7</sup>

## **Das Spektrum zwischen Konvention und Systementhebung: Überlegungen zum Umgang mit Rassismus in der Medienwissenschaft**

### **Teil 1 – Die Konvention des Schreibstils beherrschen/unterminieren können**

Wenn sich aus dieser Einleitung unterschiedliche Stimmen heraushören lassen, so ist das dem Umstand geschuldet, dass wir sie nur teilweise einer homogenisierenden Orchestrierung unterzogen haben. Zur Konvention wissenschaftlicher Textproduktion gehört sicher auch die Einheitlichkeit im Stil.

<sup>6</sup> Vgl. Karen Barad: *Agentieller Realismus*, Berlin 2012.

<sup>7</sup> Dies sei hier bewusst so formuliert, ohne den materiellen Anteil dieser Texte zu vergessen, ganz im Sinne von Haraways «materiell-semiotischem Knoten», vgl. u. a. Donna Haraway: *Situated Knowledges: The Science Question in Feminism and the Privilege of Partial Perspective*, in: *Feminist Studies*, Bd. 14, Nr. 3, 1988, 575–599, hier 595.

Die Einleitung widersetzt sich dieser Konvention in mehrfachem Sinne: als Intervention, um das hegemoniale Moment, das die Konvention aus historischer Beständigkeit machtvoll entlehnt, zu irritieren; denn antirassistische Praxis besteht nicht nur in der Hinterfragung des Status quo, sondern auch in seiner Provokation, Irritation, Dekonstruktion. In diesem Anliegen, die Ordnung der Dinge zu destabilisieren, ähnelt antirassistische Praxis künstlerischer Arbeit, bezieht sich aber – wie die meisten marginalisierten Interventionsformen – nicht in willkürlichem Maße auf das System (Pataphysik), innerhalb dessen es durchkreuzende Rupturen im Sinnhaften zu hinterlassen sucht. Antirassistische Praxis bezieht sich dezidiert auf solche Kritik, die die Ordnung der Dinge vor allem im Rassistischen berührt.

Wenn hier also durch die Nichtauflösung unterschiedlicher Schreibstile einer Polyphonie der Stimmen Raum gegeben wurde, so könnte dies in einer vornehmlich rassialisierten Lesart als Unfähigkeit gedeutet werden, Einheitlichkeit im Schreiben herzustellen. Oder aber die Entscheidung und Gestaltung wird in dieser Doppelfunktion, als Repräsentation der Vielfältigkeit der Stimmen sowie als performativ-bewusste Intervention wahrgenommen und damit in einen Raum übertragen, in dem die kulturelle Konstruiertheit der Herausgeber\_innenschaft nicht durch das Medium *race* deformiert wird. In der zweiten Lesart ginge es um das Moment einer Bindung, die den Rassismus hinter sich zu lassen sucht, während die erste Lesart eine Paranoia freisetzt, die in der Ordnung der Dinge und damit im Ausschluss des Anderen ihr Eigenstes stabilisiert wissen will.

Wichtiger als die Entweder-oder-Logik der Frage, ob die Bändigung der multiplen Schreibstile Unfähigkeit oder Absicht ist, ist der selbstbefragende rhetorische Modus, den das Bedenken solcher rassialisierten Deutungsmöglichkeiten des Außen permanent hervorbringt.

### **Zur Notwendigkeit einer Ontologie des Rassismus, die es ermöglicht, gegen Rassismus zu argumentieren**

Insbesondere die Geistes- und Kulturwissenschaften kennzeichnet, dass die von ihnen produzierten Textkulturen undurchdringlich erscheinen. Die Auseinandersetzung mit dieser komplexen und sehr oft unzugänglichen Textkultur führt angesichts der Unsicherheiten von meist mehrsprachig aufwachsenden Migrant\_innen oder PoC wiederum dazu, dass die Kämpfe des Bestehens und Überlebens im Studium besonders viel Unsicherheit hervorrufen: Es entstehen Gefühle der Unzulänglichkeit.<sup>8</sup> Solche Gefühle gehören wie in vielen anderen Arbeitsbereichen dazu; doch das Gefühl auf Seiten von Migrant\_innen ist strukturell um ein Vielfaches öfter anzunehmen, insofern Mehrsprachigkeit schon auf systemischer Ebene beispielsweise in der Schule rassistisch kategorisiert und eingeordnet ist und sich eine solche Kategorisierung an der Hochschule anders gelagert fortführt.

<sup>8</sup> Vgl. hierzu auch den Text «Dear white Professors» in diesem Heft, 172–179.

Obwohl linguistische Studien nachweisen, dass mehrsprachiges Aufwachsen und Leben die betreffenden Subjekte und ihre Umwelt grundsätzlich kulturell bereichert, wird in früherzieherischen und schulischen Kontexten häufig eine Zwei-Standard-Praxis umgesetzt, die zwischen wertvollen und wertlosen Mehrsprachigkeiten unterscheidet.<sup>9</sup> Während sogenannte <Prestigesprachen> wie etwa Französisch als nicht-benachteiligend empfunden werden, wird das Sprechen der arabischen, türkischen sowie vieler weiterer nicht-westeuropäischer Sprachen (sogenannte *low-culture*-Sprachen) als Benachteiligung für die Bildungssozialisation betrachtet. Diese ungeforderte und grundsätzlich auch unterdrückte Mehrsprachigkeit erlaubt es den betroffenen Generationen nicht, eine hohe Sprachsouveränität zu erlangen. Im Kontext eines besonders sprachsensiblen und sprachkomplexen Studenumfelds wie den Kultur- und Geisteswissenschaften reproduzieren sich so die schon in der früheren Bildungssozialisation angelegten Benachteiligungen und Verunsicherungen. Oder auch anders und für das Fach gewendet: Produktivität innerhalb der Medienwissenschaft verlangt immense Sprach- und Denksouveränität. Das mit medienwissenschaftlichem Tun verbundene Anforderungsprofil ließe sich nicht nur auf die Kompetenz der Sprachfähigkeit beziehen, sondern unentwegt fortspinnen. Insofern das Kompetenzprofil bestimmte Milieus und Kulturen favorisiert und andere benachteiligt, ist es rassistisch strukturiert und diese rassistische Reproduktion setzt sich permanent fort.

Wie gehen wir als Gastherausgeber\_innenteam des Schwerpunkts nun mit dieser *double-bind*-Struktur der Rassialisierung um? Ein *double bind* ist sie deswegen, weil jede hier für die Ausgabe getroffene Entscheidung eine Mentalisierung auf Seiten ihrer Leser\_innenschaft voraussetzen muss, deren Gestaltetheit nur zwischen den Polen von <rassialisiert> oder <nicht-rassialisiert> möglich erscheint. Insoweit wir hier also eine Ausgabe zu Rassismus avisieren, die anti-rassistische Möglichkeiten für die Medienwissenschaft produktiv zu verhandeln sucht, stellt das Konzept des Rassismus und so auch die Annahme der Existenz rassistischer Dispositionen, die sich in Institutionen niedergeschlagen haben und die eine als *weiß* angenommene Medienwissenschaftskultur voraussetzt, ein essentialistisches Bezugsfeld dar.

Wir sind uns also der Ontologien im Heft bewusst. Wir benötigen sie, um Argumente im Sinne einer diskursiven Verhandlungsstruktur artikulieren zu können. Anhand der Erörterung von Strategien des Peer-Review-Verfahrens sollen nun exemplarisch zwei Wege antirassistischer Wissenschaftsarbeit verhandelt werden.

## **Teil 2 – Die Konvention der Beitragsinklusion beherrschen/unterminieren können**

Die Abfassung medien- und kulturwissenschaftlicher Texte ist geprägt von einer Reihe von Konventionen. Dazu zählt, dass spezifische Techniken und (Wissens-) Kompetenzen beherrscht und ausgebildet werden, etwa die Herstellung eines

<sup>9</sup> Vgl. Brigitta Busch: *Mehrsprachigkeit*, Wien 2013, insb. Kap. 2 und 3.

Theorieüberhangs, der die Infragestellung von Parametern wie Objektivität mit sich bringt; die Meisterung erkenntnistheoretischer Grundannahmen; die Einübung anti-essentialistischen Denkens von Konzepten wie Natur, Kultur, Sprache, Bild sowie die Vermeidung einer Reduktion des Medienbegriffs auf technische Medien (TV, Computer, Radio usw.).

Als erfolgreiche Texte unserer Disziplin gelten meist solche, die oben Genanntes erfüllen und diskurshistorisch kompetent und systematisch die von ihnen avisierte medientheoretische Reflexion darbieten. Angesichts der epistemologischen Voraussetzungen aktueller herrschaftskritischer Diskurse (Postkolonialismus, Antirassismus, Anti-Eurozentrismus) können jedoch den Maßstäben der Medienwissenschaft entsprechende Texte den Techniken und Wissenskompetenzen der Themen, die auch das vorliegende Heft motivieren, zuwiderlaufen, können sie doch in ihrem Habitus postkoloniale, rassistische und eurozentrische Dynamiken reproduzieren – selbst dann, wenn sie gegen die genannten Herrschaftskräfte anzuschreiben glauben. Herrschaftskritik verkümmert in solchen Texten zur performativen Geste, die mehr einem Trend folgt, als einer Infragestellung der eigenen Verstrickungen in Herrschaftsprozesse und -systeme.

Der Ein- oder Ausschluss von Beiträgen, auch für den Heftschwerpunkt, folgt nicht etwa einer allgemeingültigen Gebrauchsanweisung, sondern steht in einer Wechselwirkung mit geltenden Normierungen dessen, was als angemessener Schreib- und Denkstil und was als inklusionswürdige Position (etwa Status, aber auch Identität, beide hängen voneinander ab) angesehen wird.

Während Texte, die im medienkulturwissenschaftlichen Kontext erfolgreich sind und funktionieren, den einen Pol repräsentieren, stellen andere Texte den entgegengesetzten Pol innerhalb des Spektrums zwischen der Beherrschung der Schreib- und Forschungskonventionen des Faches und ihres Aufbrechens dar. Texte können handwerkliche Mängel und Nicht-Beherrschungen von Kompetenzen aufweisen, die eine umfassende Überarbeitung notwendig machen, aber dafür den medienkulturwissenschaftlichen Diskurs vorantreiben. Dennoch würde ein solcher Text durch die üblichen Raster, wie etwa ein Double-Blind-Peer-Review-Verfahren, fallen. Wissens- und wissenschaftskritische Beiträge sowie einzelne, teilweise assoziativ-kreative Ideen verpuffen, weil die Erfüllung normativer Prinzipien (die nicht nur wissenschaftlicher Art sind) die Grundlage für Inklusion bildet. Welcher Text also aufgrund welcher Qualitäten oder Unzulänglichkeiten wann und warum aufgenommen oder ausgeschlossen wird, betrifft auch in ganz besonderem Maße die Frage danach, welche Autor\_innen und welche Qualitäten oder Unzulänglichkeiten wann als schützenswert erachtet werden.

Solch eine Figuration von Entscheidungen im Zusammenhang von Inklusion und Exklusion unserer Schriften macht die wertekulturelle Situation deutlich, in der die Beherrschung der notwendigen Minimalkonventionen des Faches vor andere Werte wie Originalität, Experimentalität oder

Innovation gestellt werden: Werte, die in einem Text stark ausgeprägt sein können, ohne dass damit seine Aufnahme in das System der <funktionierenden Texte> gesichert wäre. Doch die Beschreibung arbeitstechnischer oder textkultureller Gründe stellt nur eine Facette einer mächtigen strukturellen Dynamik dar, die Konventionen vor anderen, systemdestabilisierenden Werten favorisiert.

Die (unbewussten) Mechanismen bei der Einordnung der Arbeit von als PoC angenommenen Wissenschaftler\_innen stehen oftmals unter mehrfachem Vorbehalt, der als rassistisch zu verstehen ist. Insofern der Rassismus darin besteht, PoC tendenziell weniger wissenschaftsintellektuelle Befähigung zuzusprechen, kann diese Dynamik für die vorliegende Ausgabe nicht ausgeschlossen werden. Nehmen wir also an, wir hätten unkonventionelleren Texten den Vorzug gegeben sowie unkonventionelle Textwerte vor konventionelle gestellt, wäre nicht auszuschließen gewesen, dass unsere aktive Entscheidung, systemfreundliche Werte dieses Mal nicht zu favorisieren, als Unfähigkeit ausgelegt worden wäre, solche konstitutiven Konventionen des Systems zu bestimmen.

Derartige Konjunktive internalisieren sich auf Seiten Rassialisierter, bei denen ein enormer Beweisdruck entsteht bzw. auch soziopsychisch angeeignet wird. Selbstverständlich sind auch *weiße* Nachwuchswissenschaftler\_innen von solchen Psychodynamiken nicht ausgenommen; aber rassistische Dispositionen erzeugen eine größere Wahrscheinlichkeit dafür, dass Lesarten des wissenschaftlichen Handelns von PoC sich mit rassistischen Dynamiken verschränken.

### **Teil 3 – Die Konvention des Peer-Review-Verfahrens beherrschen/unterminieren können**

Wir haben für diesen Schwerpunkt das Peer-Review-Verfahren geöffnet, um einerseits die meist unsichtbar bleibende Arbeit des Begutachtungsverfahrens sichtbar zu machen. Andererseits sollte ein gemeinsames Denken an Texten und Themen dazu beitragen, den in dieser Ausgabe geführten Diskurs zu stärken und weiterzutragen. Die in die jeweiligen Texte integrierten Zitate aus den Gutachten dokumentieren diesen Prozess. Warum war es uns wichtig, diese Arbeit sichtbar zu machen? Unsere Annahme ist, dass die bestehenden Strukturen Lebensweisen und Existenzmodi begünstigen, die auf dem Ausschluss rassialisierter Positionen beruhen.

Beim Double-Blind-Peer-Review-Verfahren, das als oberstes Kriterium das Qualitätsprinzip behauptet, soll Gerechtigkeit durch <Blindheit> hergestellt werden. Ein Open-Peer-Review-Verfahren scheint dem Qualitätsprinzip nicht in dem Maße zu widersprechen, als dass der mit dem <blinden> Verfahren einhergehende mögliche Qualitätsgewinn mehr wert wäre, als die Prinzipien Solidarität, Umsicht, Fairness und Vertrauen. Eine Zeitschriftenausgabe, die sich

antirassistischer Praxis widmet, kann nicht zwischen den Polen einer positiven Diskriminierung und einer Vorstellung, dass das Verfahren nicht-rassistisch sein könne, da es (rassismus-)blind ist, stecken bleiben. Sie muss insofern jenseits dieser Prämisse der Gerechtigkeit durch Blindheit liegen, als sie einem Prinzip der Minimalschädigung folgt. Der Ausgangspunkt antirassistischer Arbeit besteht stets darin, die mögliche Verletzlichkeit des\_der Anderen durch die Schaffung von Strukturen zu minimieren. Unverletzlichkeit kann es nicht geben, schon gar nicht dort, wo Produktion in ein kapitalistisch funktionierendes System eingebettet ist. Dort, wo es möglich ist, menschliches Leben durch die Verweigerung der Anerkennung einer irgendwie geleisteten Arbeit zu schädigen, kann es keinen Antirassismus geben – gemeint sind solche Strukturen also, die Schädigung und Gewalt fortschreiben. Dort, wo Qualitätssicherung die Maximalpredigt ist, kann die Anerkennung der menschlichen Fragilität keine Maximalprämisse sein.

### **Zur Logotektonik des Schwerpunktteils**

Antirassistische Arbeit setzt an unterschiedlichen Bereichen an. Die Logotektonik des Heftschwerpunkts adressiert demgemäß konkrete Praxisbereiche wie Forschung, Lehre, wissenschaftliches Schreiben; sie sucht darin auch im Hinblick auf Theorie(-bildung) produktive Momente für die medienwissenschaftliche Forschung zu finden.

Die Beiträge zu diesem Heftschwerpunkt zeigen ein Spektrum an antirassistischen Interventionsmöglichkeiten, das von inklusiven Epistemologien (Schröter), die auch ein Potenzial materialistischer, d.h. situierter Medienwissenschaft darstellen (Morais Dos Santos Bruss), bis zu exzessiven Selbstreflexionen (Goutrié) reicht. Es umfasst strategisch (ent-)essentialisierende Subjektivierungstaktiken, die als Überlebens- und Widerstandsstrategien gegen Rassialisierung eingesetzt werden (Canpalat), ebenso wie affektive kritische Strategien im Umgang mit verletzendem Material, die reparativ statt paranoid verfahren (Shnayien). Teil dieses Spektrums sind überdies dekonstruktive Ansätze, diskurshistorisch-kritische Selbstbefragungen theoretischer Trends und ihre Rückbindung an Überlegungen aus der Kritischen *Weißseinsforschung* (Kadritzke) oder der postkolonialen Theorie (Breitsohl und Mohr).

Angeichts dieses Spektrums wird deutlich, dass die vorgestellten Interventionsvorschläge Ideen und Konzepte aufgreifen, die zum Repertoire der Medienwissenschaft gehören. Der Kluft zwischen der <inhaltistischen> Produktion (vielfältiger Formen medienwissenschaftlichen Wissens) und der kulturellen Matrix, die die Produktionsbedingungen der Medienwissenschaft involviert, ließe sich auch mit grundsätzlich medienwissenschaftlichen Parametern begegnen: Form, Inhalt, Prozess sind getrennt voneinander nicht angemessen zu erfassen.



### Zu den Beiträgen

CHRISTINE GOUTRIÉ geht anhand der Verfahrensweisen und Methoden der in den 1920er Jahren in der Sowjetunion entwickelten Faktographie möglichen Kreuzungspunkten von Hochschullehre und antirassistischer Praxis nach. Anschließend an Donna Haraways Konzept des situierten Wissens sowie an *critical whiteness* erörtert sie, mit welchen Methoden und Praktiken es im künstlerisch-gestalterischen Lehren der Grundlagen digitaler Medien möglich werden kann, das eigene Denken und Wissen auf Rassismen und Eurozentrismen hin zu befragen und in einen Dialog mit den eigenen Privilegien einzutreten. JIRÉ EMINE GÖZEN reflektiert hier <weiterdenkend> die Notwendigkeit, die Verteilungslast jener rassismus- und machtkritischen Interventionen zu differenzieren: Die strukturellen Dimensionen von *weiß* (im Sinne einer normativen Unsichtbarkeit) sowie nicht-*weiß* reglementieren nach wie vor, welche Positionen sich davon ausnehmen können, ob sie jene Interventionen denken und vor allem performieren müssen.

Die Verletzlichkeit in der Selbstoffenbarung und -positionierung zwecks Widerstands gegen Rassismus zeigt sich am vehementesten in ESRA CANPALATS Beitrag. In ihrem Text geht sie Fragen nach der Verflechtung der eigenen Forschungsarbeit und ethnischer Subjektivität nach. Ausgehend von der Erfahrung, dass sowohl innerhalb der *weiß* und eurozentristisch geprägten Akademie als auch in deutsch-türkischen und türkischen Kontexten Authentizität zugesprochen, in Frage gestellt oder auch abgesprochen wird, reflektiert sie, welche Formen der Übersetzung des Denkens, Schreibens, Forschens und In-der-Welt-Stehens aus einer kulturell hybriden Zwischenposition möglich sind.

Dem Thema der Verletzlichkeit widmet sich aus einer anderen Perspektive auch der Beitrag von MARY SHNAYIEN, indem er untersucht, in welchem Verhältnis wir Forschende zu uns affizierendem Material stehen und welche mitunter paranoiden Reaktionen und Umgangsweisen dadurch hervorgerufen werden. Ausgehend von Eve Kosofsky Sedgwards Modell des *paranoid and affective reading* und der Reflexion darüber, was Sicherheit innerhalb dieses abgesteckten Rahmens bedeuten soll und kann, wirft der Beitrag eine zentrale Frage auf: «Wie ist eine Kritik an verletzendem Material möglich, ohne die Affektkulturen des analysierten Materials [...] strukturell [zu] wiederholen?» Wie setzen wir also gemeinsam antirassistische Praxis um?

Der Beitrag von LOUIS BREITSOHL und ELISABETH MOHR adressiert explizit kommunikative Modi, wobei die Form des Textes performativ seiner eigenen Diagnose folgt: Ein Weg zu antirassistischer Praxis könnte im Auffinden und Erlernen anderer Formen wissenschaftlichen Schreibens liegen. Zweigeteilt und dennoch kollaborativ geschrieben erzeugt der Beitrag ein Spannungsverhältnis, welches sich zwischen Vehemenz und Vorsicht, zwischen Forderung und Befragung, zwischen Ausbruch und Einsicht erhält. Zunächst überlegt Louis Breitsohl, wie antirassistische Arbeit in der Akademie aussehen

kann. Im Anschluss geht Elisabeth Mohr anhand der Suche nach einer eigenen Positionierung der Frage nach, wie es aus dem Kontext der westlichen Wissensproduktion möglich wird, sich an die Seite von marginalisierten Positionen zu stellen.

Sind mit Postkolonialität und Eurozentrismus zentrale Konzepte aufgerufen, die eine hegemoniekritische Reflexion der wissenschaftskulturellen Situation der (Medien-)Wissenschaften besonders effektiv zu leisten imstande sind, erlaubt noch ein dritter, besonders ambivalenter Begriff, die Situation der Medienwissenschaft produktiv zu reflektieren: *«Weißsein»*. TILL KADRITZKE demonstriert, wie die Hinterfragung eines medienwissenschaftlich präferierten Theoriefeldes, namentlich der Affekttheorie in Bezug auf die Filmgeschichte, über die Kategorie des *Weißseins* rassismusanalytisch fruchtbar gemacht werden kann. In seinem Beitrag analysiert er die gegenkulturelle Filmbewegung des New Hollywood und zeigt, inwiefern der wissenschaftliche Rekurs auf die Affekttheorie eine Vernachlässigung der politisch notwendigen Sinndimension mit sich bringt. Die Entkopplung von Repräsentation und Affekt erscheint nämlich gerade dort möglich, wo *Weißsein* eine aus der eigenen soziokulturellen Matrix entstrickte, entkontextualisierte Philosophie voranzutreiben vermag, welche die Affekttheorie ermöglicht.

Neben dem Konzept der Sprache ist es sicher auch das Konzept des *«Bildes»*, das als universales mediales Prinzip jene epistemologisch universalisierenden Tendenzen des Westens in philosophischer Hinsicht deutlich macht. Es ist der Beitrag von JENS SCHRÖTER, der mit dem Wunsch nach einer global-additiven Epistemologie die Eurozentrismen des westlichen Bilddiskurses kritisch reflektiert.

Bedeutet diese epistemologische Additivität, die Schröter einfordert, nach einem regional dem Eigenen Fernliegenden (global-enthierarchisiertes Wissen) zu suchen, geht der Beitrag von SARA MORAIS DOS SANTOS BRUSS wieder in die ureigenen Gefilde medienwissenschaftlicher Theoriebildung zurück: Antirassistisches Potenzial liegt nicht (nur) in denjenigen Subjekten, die Medienwissenschaft betreiben, sondern auch in deren paradigmatischem Theorierepertoire. Die Autorin konkretisiert diese Behauptung in ihrer Kritik an einer spezifischen Genealogie von Friedrich Kittlers *«medialem Apriori»* und indem sie einen Anschluss an Arbeiten Sylvia Wynters herstellt. Sie zeigt, in welcher Weise *race* und Medientechnik miteinander konstitutiv wirken und wie dies durch eine materielle, d.h. entschiedener situierte Medienwissenschaft mitgedacht werden muss.

## Die Interviews

Im Interviewsegment des Schwerpunkts finden sich zwei Beiträge, die in ihrer Stoßrichtung und ihrer Verhandlung von rassistischen Dynamiken jeweils zwei Pole aufspannen. Die vielfachen Wechselwirkungen von Übersetzung und dem,

was damit einhergeht, sind Thema des ersten Interviews von ÖMER ALKIN mit W.J.T. MITCHELL. Der Fokus des Interviews richtet sich auf Mitchells Buch *Seeing Through Race*, dessen medientheoretische Prämissen und Relevanzen Alkin im Gespräch adressiert.<sup>10</sup> Mitchell versteht das Problem von *race* als ein medienpädagogisches und macht entsprechend die Prämisse seines Buchs stark: Wären wir alle medienkompetenter und rationaler im Umgang mit *race*, könnten wir angemessener mit unserer Paranoia umgehen.

Im Gespräch von JOHANNES BRUDER und NELLY Y. PINKRAH mit SARAH SHARMA geht es um Marshall McLuhans Erbe, den Umgang mit seinem Werk sowie mit der Institution. Wenngleich McLuhan über *race*, Geschlecht und Klasse nicht per se und jenseits der etablierten männlichen und *weißen* Position nachdenkt, ist in seinen Konzepten die Anerkennung des Umstands angelegt, dass diese Kategorien technologisch produziert werden. Sharma stellt den Fokus rekursiv in Bezug zur eigenen Positionalität und zeigt so Möglichkeiten auf, die singulären Narrative des Theoretikers zu ergänzen und aufzubrechen. Der eigene praxeologische Modus, so entsteht der Eindruck, korrespondiert auch mit Sharmas Existenzmodus – sie entwickelt ihre Inhalte aus ihren Praktiken und auch darin findet sich ein selbstbezügliches Moment.

### Unsagbarkeit und Zukunft

Wie viele Ebenen der Reflexion, der Abstraktion, des Metadiskurses lassen sich überhaupt öffnen, um etwas zu erzählen, was zwar erzählbar, aber nicht sagbar ist? Die unausgesprochenen Konventionen dafür, was eben nicht sagbar ist, verändern sich je nach Situation und Kontext, je nach Involviertheit und Bezug, je nach Taktik oder Strategie. Nach dem Produktionsprozess dieser Ausgabe ist klar, was wir alle bereits wussten: Keine Institution ist frei von Mechanismen, die gesellschaftliche Unterdrückungssysteme produzieren, Erstere sind jedoch vielfältig und flexibel.

Es macht strategisch keinen Sinn, alles transparent zu machen, jedes falsche Wort abzutippen, jede Stimmung zu beschreiben, alles auszubuchstabieren und verhandeln zu wollen. Dennoch gilt es einen Umgang zu finden mit all dem, was nicht transparent gemacht werden soll oder darf.

Die Medienwissenschaft kann nur dann ihren eigenen Prämissen von Machtkritik, der Horizontalisierung von Handlungsmacht, der ent-ontologisierenden Essentialismuskritik und vielem mehr genügen, wenn sie diese als Kultur auch selbst lebt. Zwischen den theoretischen Ambitionen der Medienwissenschaft und ihrem eingeschränkten Willen, ihre eigene kulturelle Matrix für Rassialisierte und *andere* Andere zu öffnen, besteht ein konkretes Band, dessen Kritik in etwa der Kritik von postkolonialen Theoretiker\_innen über die Diskursohnmacht/Unhörbarkeit von Subalternen entspricht.<sup>11</sup> Dieses Argument ist nicht neu und muss trotzdem von einer Medienwissenschaft, die sich mit diesen

<sup>10</sup> W.J.T. Mitchell: *Seeing Through Race*, Cambridge (MA) u. a. 2012.

<sup>11</sup> Spivak: *Can the Subaltern Speak?*

Themen auseinandersetzt, in die eigene wissenschaftskulturelle Praxis übersetzt werden, um nicht in einer leeren Geste zu erstarren.

Wie wollen wir weitermachen: die Bedingungen unseres eigenen Arbeitens nach außen abschotten – vielleicht auch in Richtung anderer Disziplinen und Aktivitäten außerhalb der Wissenschaft als permanente Legitimation gegenüber den Natur- und Sozialwissenschaften –, indem wir unsere Expert\_innenkultur ins Exorbitante einer Produktivität führen und dazu das rassistische System weiter nutzbar halten *und* weiter nutzen; oder indem wir auch bei der eigenen Wissenschaftskultur und im eigenen wissenschaftskulturellen Handeln jenen herrschaftskritischen Annahmen treu bleiben, die unser Fach im Tiefsten berühren – und dabei trotzdem weiter überleben. Es ließe sich das alles auch verkürzen – und wir meinen das weniger medial-gouvernemental,<sup>12</sup> als es klingt: Die Zukunft der Medienwissenschaft liegt in Ihren Händen. Was werden Sie damit machen?

<sup>12</sup> Vgl. Timo Skrandies: Mediale Gouvernementalität, in: Vittoria Borsò (Hg.): *Wissen und Leben – Wissen für das Leben. Herausforderungen einer affirmativen Biopolitik*, Bielefeld 2014, 281–304.

ÖMER ALKIN, JIRÉ EMINE GÖZEN, NELLY Y. PINKRAH
